# Supplementary material for: A Ni 2 P/NiMoO x nanocone electrocatalyst for efficient hydrogen evolution: tip-enhanced local electric field effect
Source: Royal Society of Chemistry journal article supplement (doi:10.1039/d4nr05221h), 2025-01-01
Supplement: d4nr05221h1.pdf [file d4nr05221h1.pdf]

## Electronic Supplementary Information

### **Ni<sub>2</sub>P/NiMoO<sub>x</sub> Nanocone Electrocatalyst for Efficient Hydrogen Evolution: Tip-enhanced Local Electric Field Effect**

Le Yu<sup>1</sup>, Xia Chen<sup>1</sup>, Shunda Cheng, Tingfeng Zhong, Ruifan Zhou, Zihua Deng\* and

Li Li

*College of Chemistry and Chemical Engineering, Chongqing University, Chongqing, China.*

*1. The authors contributed equally.*

*\* Corresponding Author. E-mail: hg2531@cqu.edu.cn*

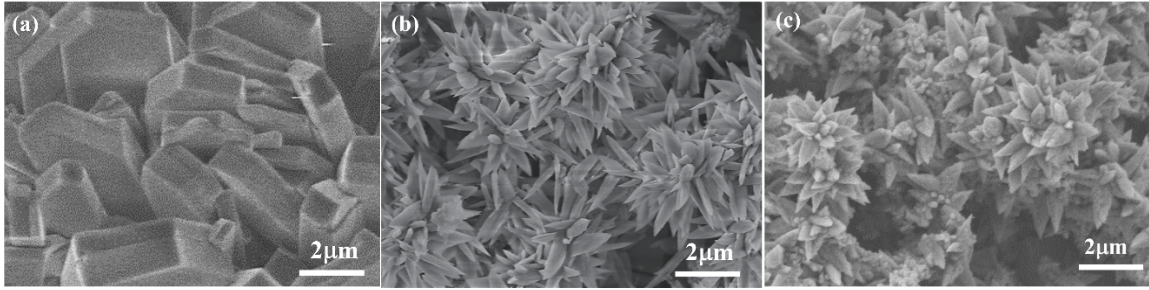

**Fig. S1** SEM images of (a) Ni-BDC, (b) NiMoO<sub>x</sub>, (c) Ni<sub>2</sub>P/NiMoO<sub>x</sub> nanocones.

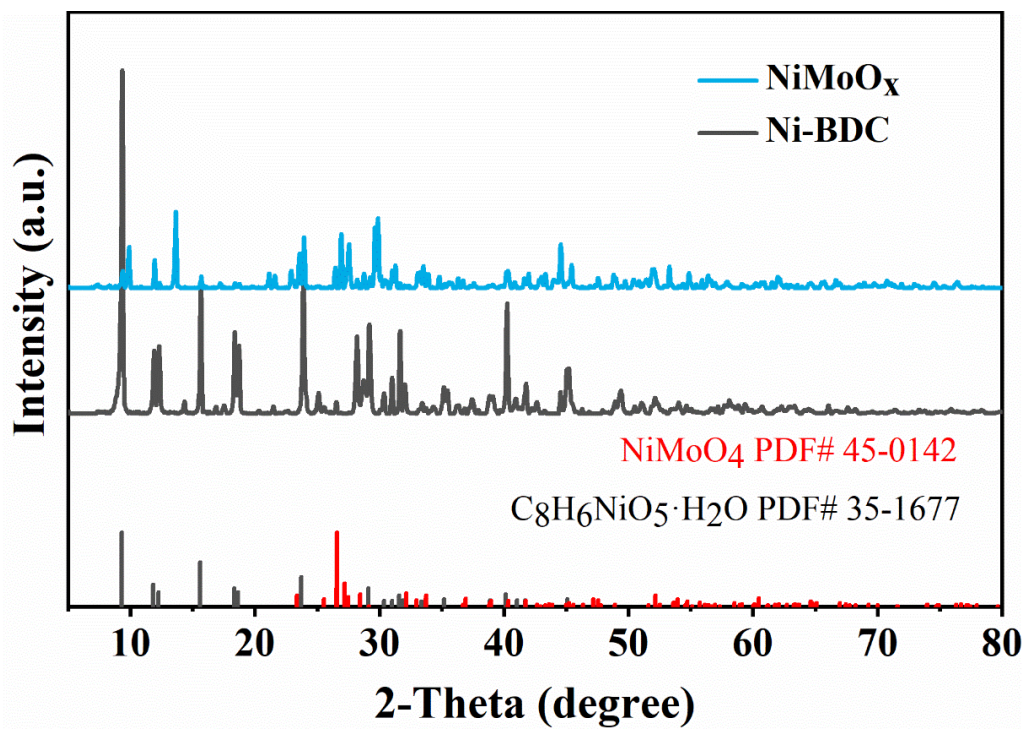

Fig. S2 XRD patterns of Ni-BDC and  $\text{NiMoO}_x$ .

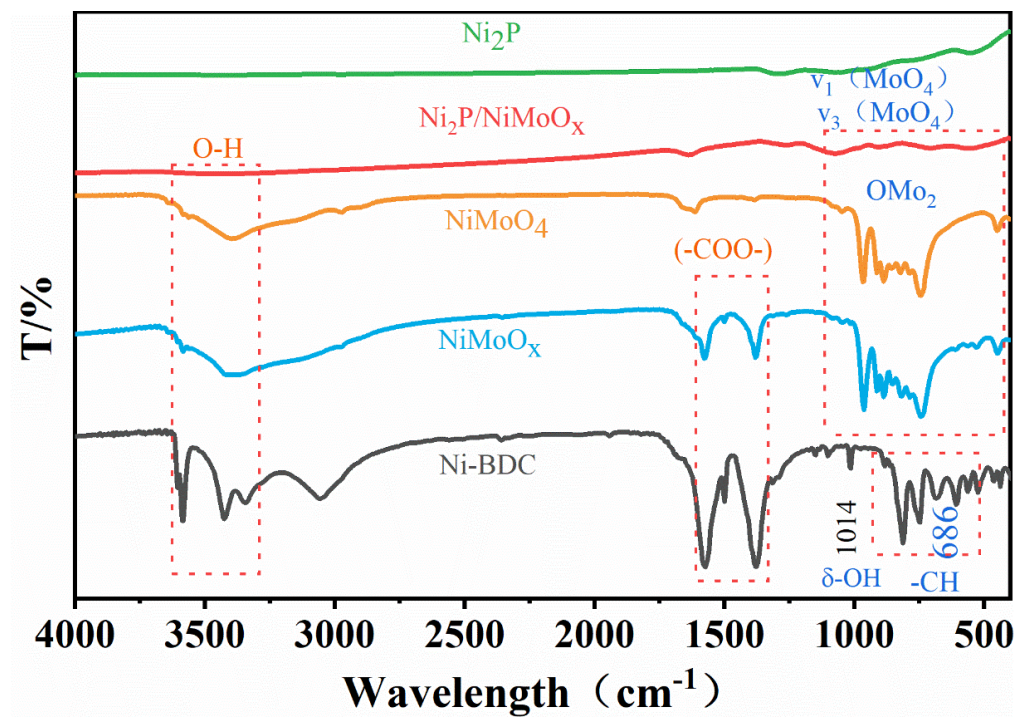

**Fig. S3** FTIR patterns of Ni-BDC, NiMoO<sub>x</sub>, NiMoO<sub>4</sub>, Ni<sub>2</sub>P and Ni<sub>2</sub>P/NiMoO<sub>x</sub> nanocones.

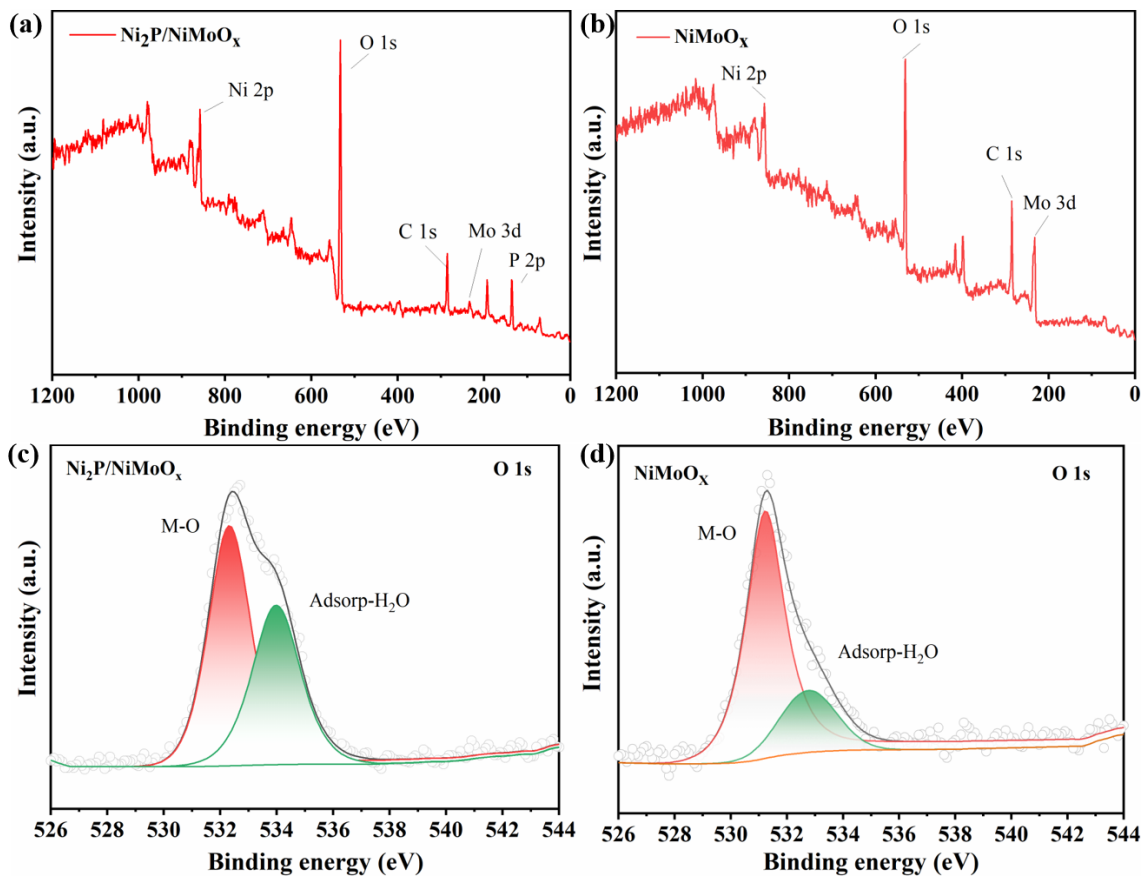

**Fig. S4** XPS spectra of survey (a, b), O 1s (c, d) for  $\text{Ni}_2\text{P}/\text{NiMoO}_x$  nanocones and  $\text{NiMoO}_x$ .

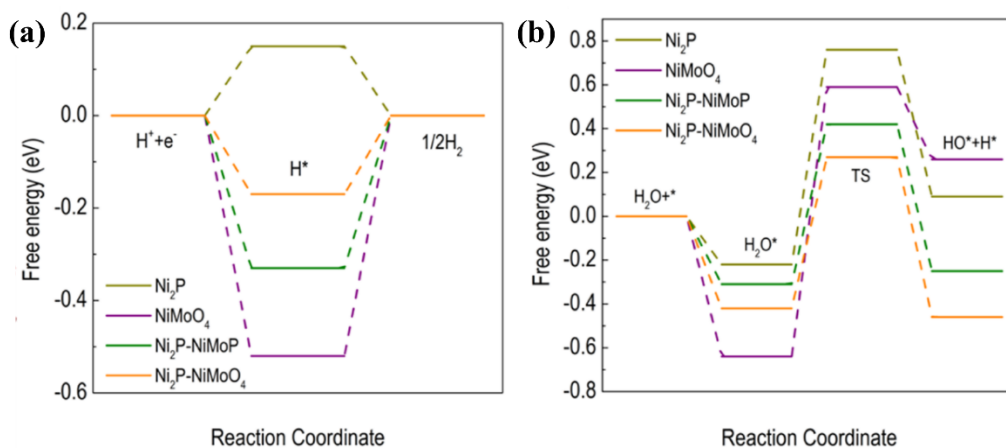

**Fig. S5** (a)  $\Delta G_{H^*}$  diagram of  $Ni_2P$ ,  $NiMoO_4$ ,  $Ni_2P-NiMoP$ , and  $Ni_2P-NiMoO_4$ [1],

(b) Reaction energy diagram of water dissociation on  $Ni_2P$ ,  $NiMoO_4$ ,  $Ni_2P-NiMoP$ , and  $Ni_2P-NiMoO_4$  [1].

DFT for similar compositions of  $Ni_2P-NiMoO_x$  has been reported in the literature[1]. Figure S5a shows that the  $\Delta G_{H^*}$  value of the  $Ni_2P-NiMoO_4$  heterostructures significantly decreases, indicating that the interactions of  $Ni_2P$  and  $NiMoO_4$  have a satisfying effect on optimizing the adsorption of  $H^*$  [1]. Figure S5b shows the corresponding reaction energy profile. The results show that the  $Ni_2P-NiMoO_4$  heterostructures are more favorable for  $H_2O$  adsorption, accelerating the Volmer step and enhancing the activity of HER.[1]

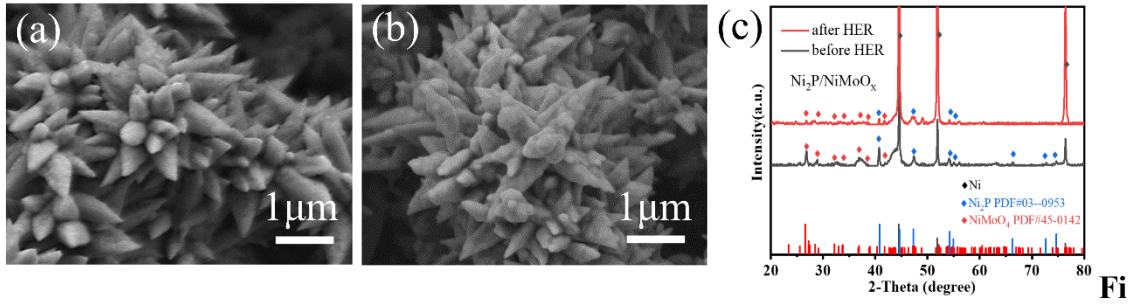

**g.** S6 Ni<sub>2</sub>P/NiMoO<sub>x</sub> nanocones SEM image before (a) and after (b) 200 h durability test, and XRD pattern (c).

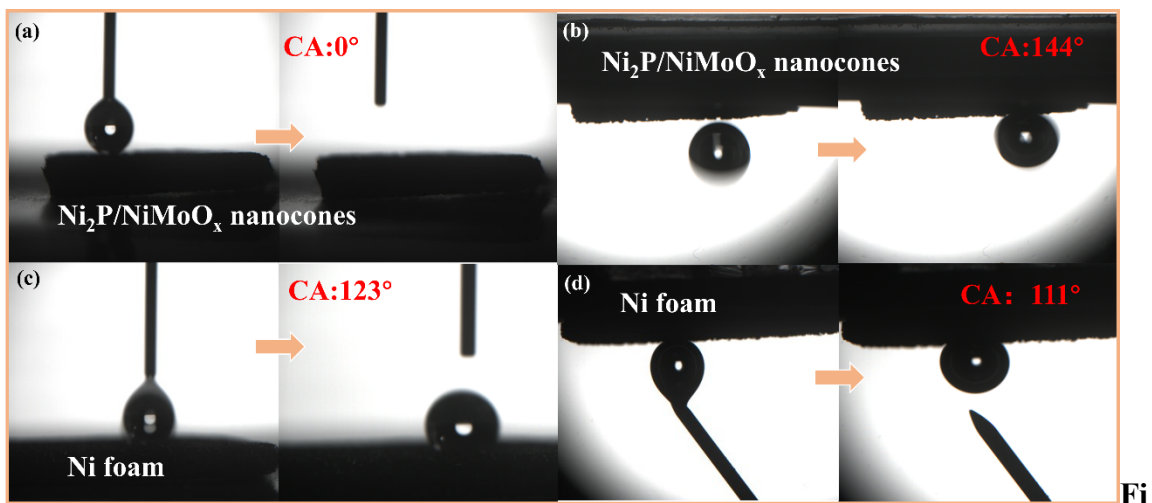

**g. S7** Images of (a) droplet contact angles (CA) and (b) H<sub>2</sub>-bubble CA on Ni<sub>2</sub>P/NiMoO<sub>x</sub> nanocones, images of (c) droplet CA and (d) H<sub>2</sub>-bubble CA on blank NF

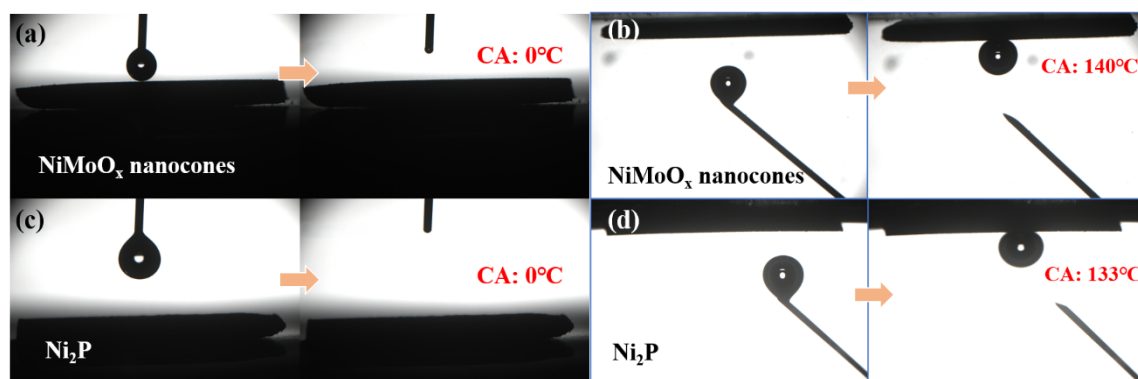

**Fig. S8** Images of (a) droplet CA and (b) H<sub>2</sub>-bubble CA on NiMoO<sub>x</sub> nanocones, images of (c) droplet CA and (d) H<sub>2</sub>-bubble CA on Ni<sub>2</sub>P.



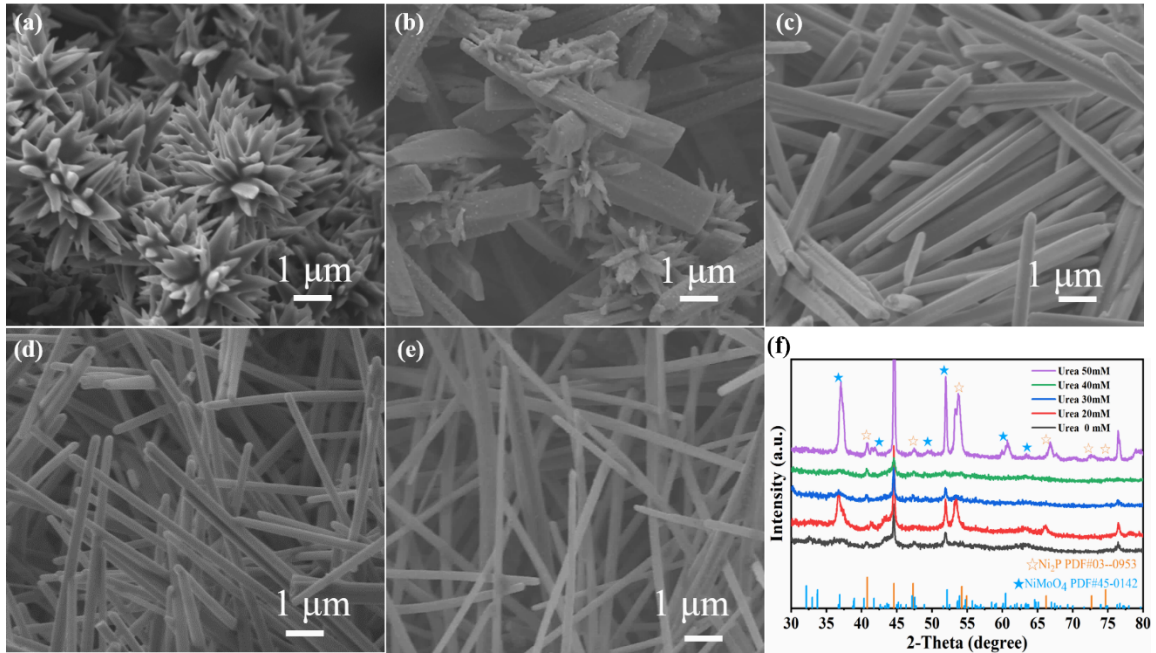

**Fig. S9** SEM images of Ni<sub>2</sub>P/NiMoO<sub>x</sub> prepared with different urea concentrations: (a) 0 mM urea; (b) 20 mM urea; (c) 30 mM urea; (d) 40 mM urea; (e) 50 mM urea; (f) XRD pattern of Ni<sub>2</sub>P/NiMoO<sub>x</sub> samples.

Ni<sub>2</sub>P/NiMoO<sub>x</sub> samples were synthesised using a method similar to that of Ni<sub>2</sub>P/NiMoO<sub>x</sub> nanocones, except for the addition of urea during the second step of the synthesis. The different morphologies of the Ni<sub>2</sub>P/NiMoO<sub>x</sub> samples (Fig. S9a – S9e) exhibited identical material compositions (Fig. S9f). And with the increase of urea concentration, the nanocone structures are gradually dissolved and converted into nanorods.

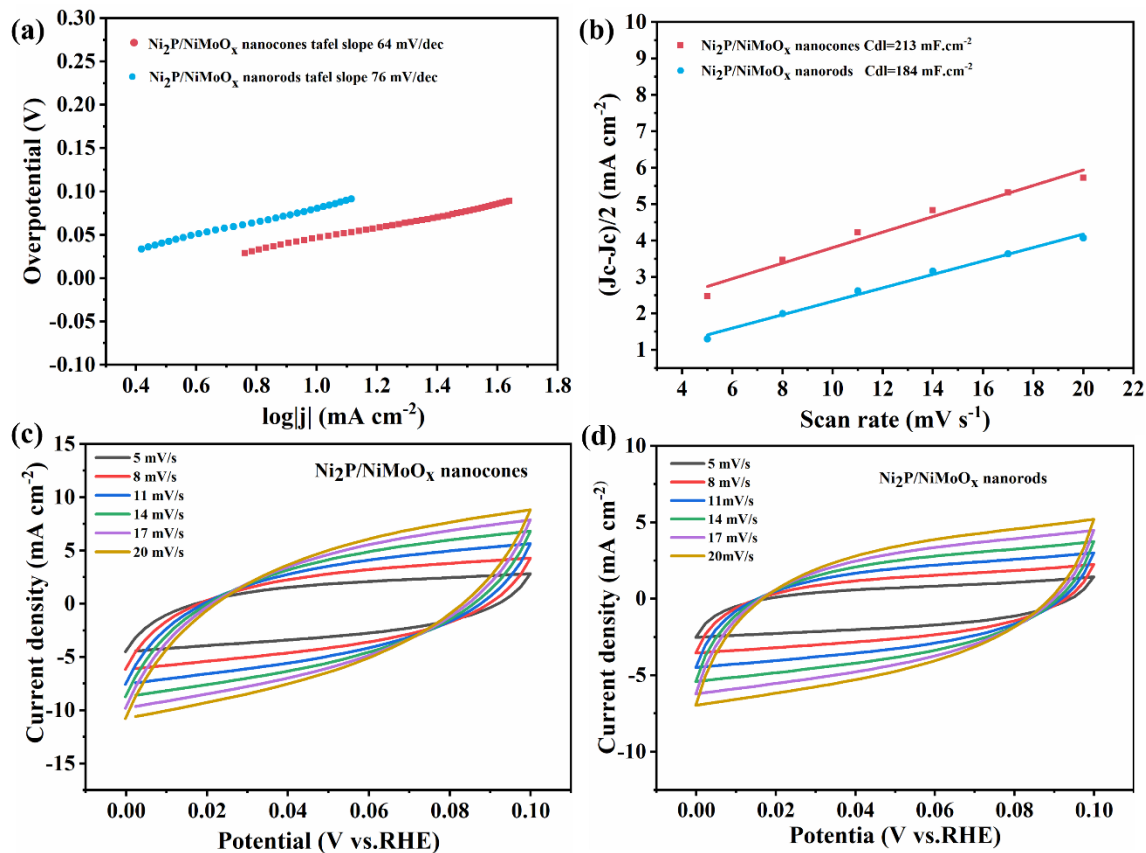

**Fig. S10** (a) Tafel slopes, (b) Double layer capacitor, (c) CV curves of  $\text{Ni}_2\text{P}/\text{NiMoO}_x$  nanocones and (d)  $\text{Ni}_2\text{P}/\text{NiMoO}_x$  nanorods under different scan rates.

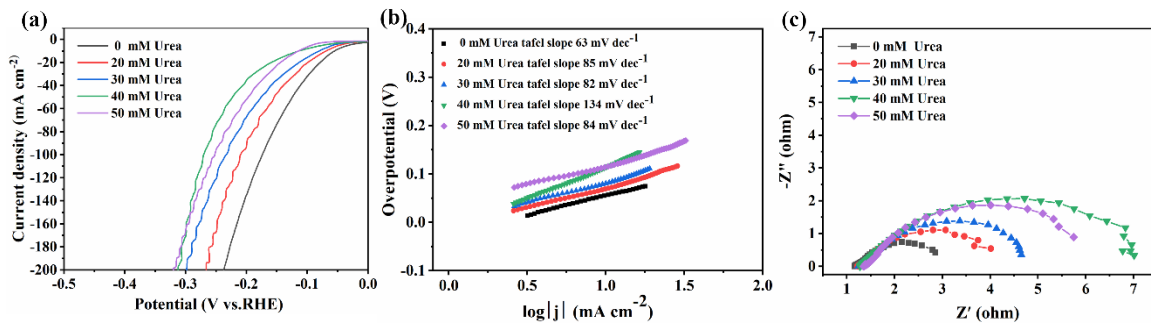

**Fig. S11** (a) LSV curves, (b) Tafel slopes, (c) Nyquist plots of Ni<sub>2</sub>P/NiMoO<sub>x</sub> sample by adding different concentrations of urea during the second step of the synthesis.

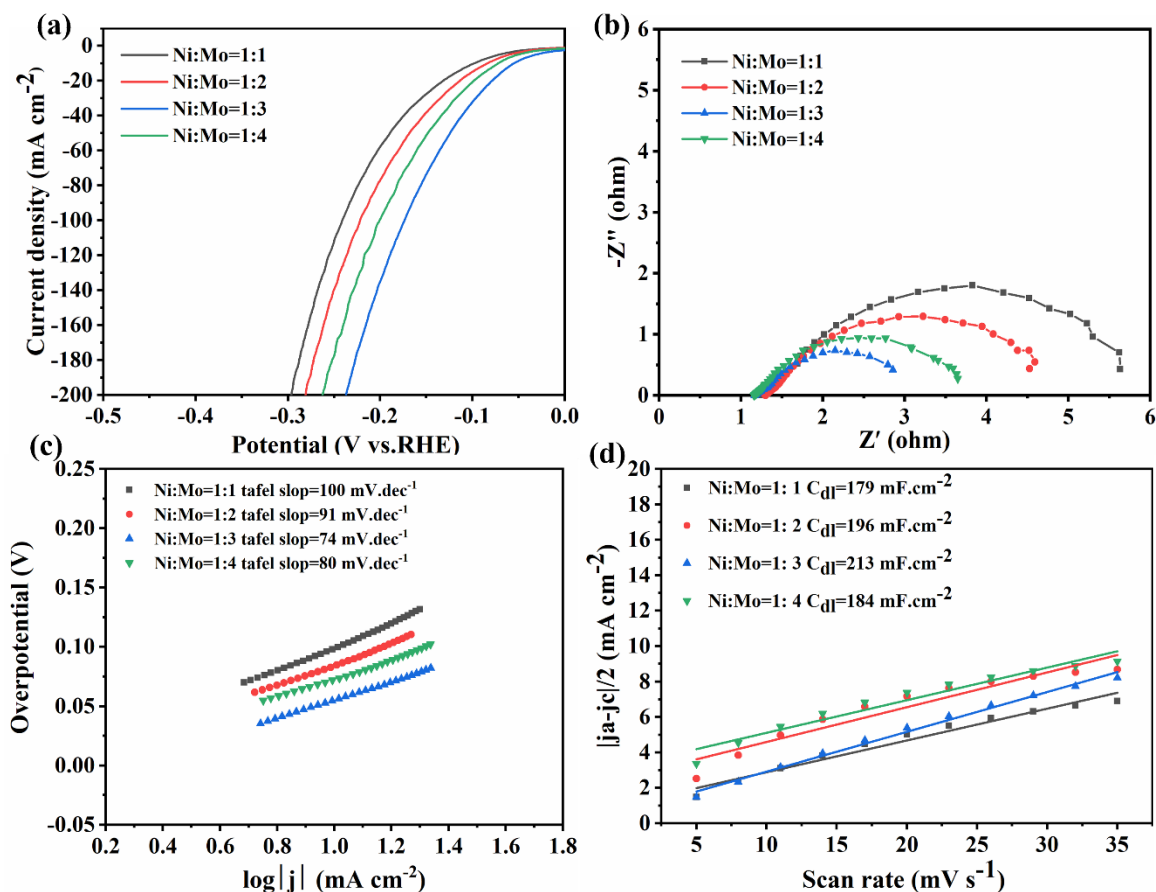

**Fig. S12** (a) LSV curves, (b) Tafel slopes, (c) Nyquist plots and (d) Double layer capacitor of  $\text{Ni}_2\text{P}/\text{NiMoO}_x$  with different Ni:Mo feeding ratios in 1 M KOH.

In order to prepare  $\text{Ni}_2\text{P}/\text{NiMoO}_x$  nanocones catalyst with excellent performance and nanocone structure, the effect of ammonium molybdate feed ratio was investigated. With the increase of the atomic molar ratio of Ni:Mo, the morphology of  $\text{Ni}_2\text{P}/\text{NiMoO}_x$  changes from nanosheet array to nanocone array. When Ni:Mo molar ratio of 1:3, the  $\text{Ni}_2\text{P}/\text{NiMoO}_x$  nanocones showed the best electrochemical performance and uniform distribution of nanocone (Fig S12-S13).

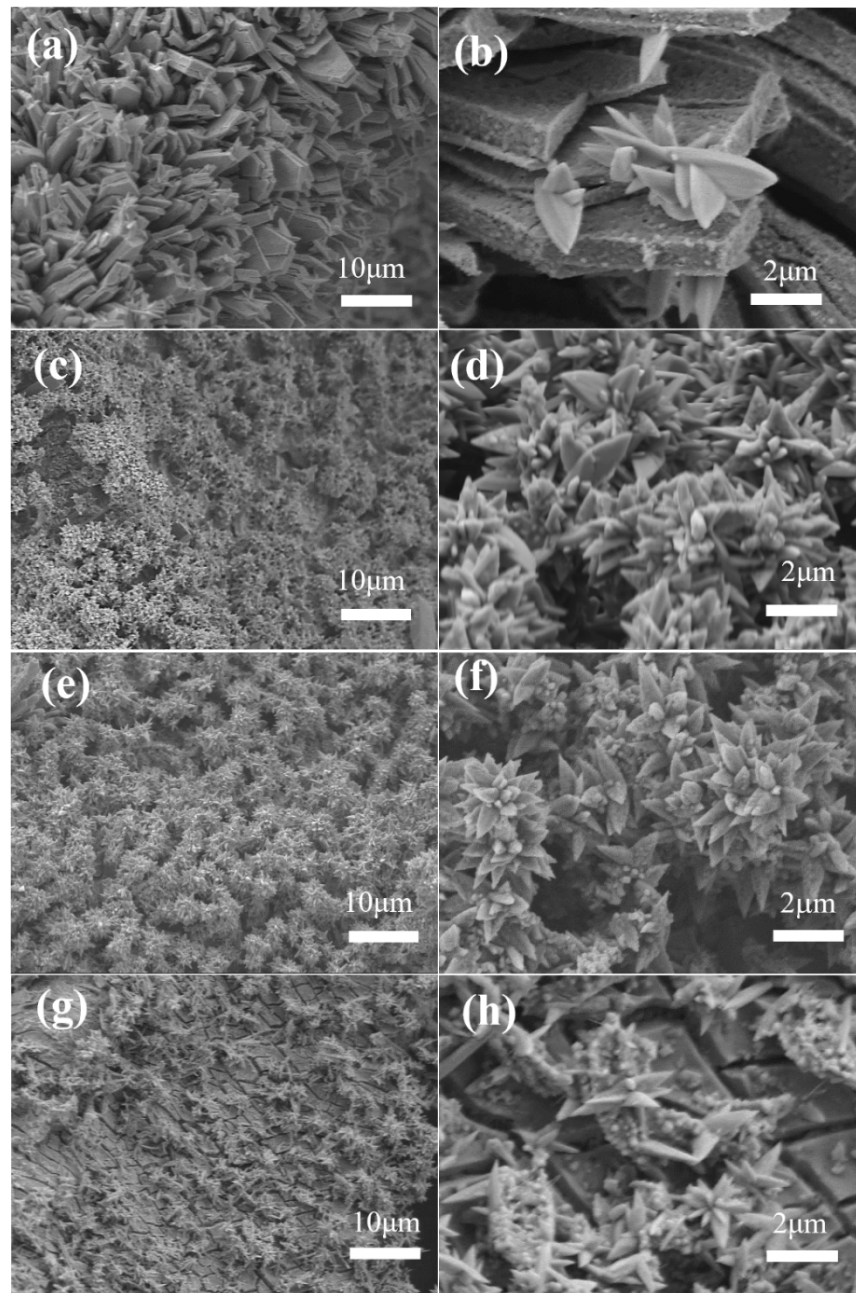

**Fig. S13** SEM images of Ni<sub>2</sub>P/NiMoO<sub>x</sub> (a-b) Ni:Mo=1:1, (c-d) Ni:Mo=1:2, (e-f)

Ni:Mo=1:3, (g-h) Ni:Mo=1:4.

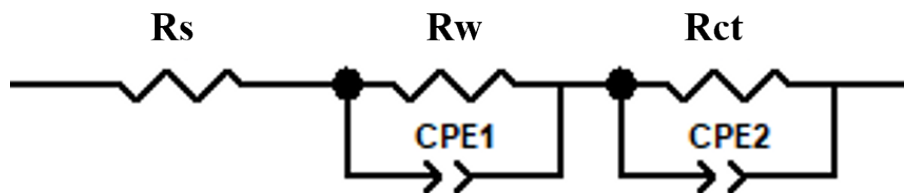

**Fig. S14** Equivalent electrical circuit used to fit with the EIS data.

EIS is not get affected by potential drop due to series resistance, and could reveal the intrinsic electrochemical properties of the catalyst interface. The Nyquist plots were fitted using the equivalent electric circuit (EEC) presented in Fig. S14. This EEC corresponds to a simple heterogeneous adsorption step. In this context,  $R$  represents the resistance component, and constant phase element (CPE) represents the capacitive component, which is used in cases of modified electrodes and electrodes coated with nanostructured materials with a high roughness factor.  $R_s$  is related to the solution impedance,  $R_w$  and  $CPE1$  are associated with solution diffusion, and  $R_{ct}$  and  $CPE2$  are related to charge transfer. The charge transfer resistance,  $R_{ct}$ , is inversely proportional to the rate of the corresponding hydrogen adsorption reaction. For the kinetically controlled HER, the  $R_{ct}$  value could be used as the basis to study the activity trend of electrocatalyst.

**Table. S1** Comparison of HER performance with previously reported phosphide-metal oxide nanostructured electrocatalysts under alkaline condition.

| <b>catalyst</b>                                            | <b><math>\eta_{10}</math> (mV)</b> | <b><math>\eta_{100}</math> (mV)</b> | <b>Reference</b> |
|------------------------------------------------------------|------------------------------------|-------------------------------------|------------------|
| Ni <sub>2</sub> P-NiMoO <sub>x</sub> nanocones             | <b>49</b>                          | <b>137</b>                          | <b>This work</b> |
| Crystalline Ni <sub>2</sub> P-Amorphous NiMoO <sub>x</sub> | 91                                 | 188                                 | [1]              |
| NiP <sub>2</sub> @MoO <sub>2</sub> /Co(Ni)MoO <sub>4</sub> | 66 ( $\eta_{50}$ )                 | 131                                 | [2]              |
| FeCo/Co <sub>2</sub> P@NPCF                                | 260                                | 380                                 | [3]              |
| V-Ni <sub>2</sub> P/Ni <sub>12</sub> P <sub>5</sub>        | 62                                 | 146                                 | [4]              |
| V-CoP@a-CeO <sub>2</sub>                                   | 68                                 | 140                                 | [5]              |
| O-CoP                                                      | 98                                 | 150                                 | [6]              |
| MnO <sub>x</sub> /NiFeP                                    | -                                  | 214                                 | [7]              |
| NiMnOP                                                     | 91                                 | 145                                 | [8]              |
| MoO <sub>2</sub> /Mo <sub>3</sub> P/Mo <sub>2</sub> C      | 69                                 | 155                                 | [9]              |

**Table. S2** the fitting values of different catalyst equivalent circuits

| <b>Catalyst</b>                      | <b>R<sub>s</sub> (Ω)</b> | <b>R<sub>w</sub> (Ω)</b> | <b>R<sub>ct</sub> (Ω)</b> |
|--------------------------------------|--------------------------|--------------------------|---------------------------|
| Ni-BDC                               | 1.275                    | 1.646                    | 24.510                    |
| NiMoO <sub>x</sub>                   | 1.291                    | 0.500                    | 19.330                    |
| Ni <sub>2</sub> P                    | 1.235                    | 0.055                    | 6.203                     |
| Ni <sub>2</sub> P/NiMoO <sub>x</sub> | 1.365                    | 0.097                    | 1.460                     |



**Table. S3** The fitting values of the equivalent circuits of Ni<sub>2</sub>P/NiMoO<sub>x</sub> catalysts

| Catalyst                                       | R <sub>s</sub> (Ω) | R <sub>w</sub> (Ω) | R <sub>ct</sub> (Ω) |
|------------------------------------------------|--------------------|--------------------|---------------------|
| Ni <sub>2</sub> P/NiMoO <sub>x</sub> nanocones | 1.365              | 0.097              | 1.460               |
| Ni <sub>2</sub> P/NiMoO <sub>x</sub> nanorods  | 1.270              | 0.677              | 2.981               |

---

| <b>Model</b>                                    | <b>Nanocone</b> | <b>Nanorod</b> | <b>Nanocuboid (3 times length)</b> |
|-------------------------------------------------|-----------------|----------------|------------------------------------|
| Tip surface charge density (C m <sup>-2</sup> ) | -0.11           | -0.09          | -0.06                              |

---

**Table. S4** Calculation results from COMSOL

## References

- [1] J.T. Ren, L. Chen, H.Y. Wang, W.W. Tian, X.L. Song, Q.H. Kong, Z.Y. Yuan, Synergistic Activation of Crystalline Ni<sub>2</sub>P and Amorphous NiMoO<sub>x</sub> for Efficient Water Splitting at High Current Densities[J]. *ACS Catalysis*, 2023, 13, 9792-9805. <https://doi.org/10.1021/acscatal.3c01885>.
- [2] Q. Xu, P. Wang, L. Wan, Z. Xu, M. Z. Sultana, B. Wang, Superhydrophilic/Superaerophobic Hierarchical NiP<sub>2</sub>@MoO<sub>2</sub>/Co(Ni)MoO<sub>4</sub> Core-Shell Array Electrocatalysts for Efficient Hydrogen Production at Large Current Densities[J]. *ACS Applied Materials & Interfaces*, 2022, 14, 19448-19458. <https://doi.org/10.1021/acsami.2c01808>.
- [3] Q. Shi, Q. Liu, Y. Ma, Z. Fang, Z. Liang, G. Shao, B. Tang, W. Yang, L. Qin, X. Fang, High-Performance Trifunctional Electrocatalysts Based on FeCo/Co<sub>2</sub>P Hybrid Nanoparticles for Zinc-Air Battery and Self-Powered Overall Water Splitting[J]. *Adv. Energy Mater.*, 2020, 10, 1903854. <https://doi.org/10.1002/aenm.201903854>.
- [4] T. Zhao, S. Wang, Y. Li, C. Jia, Z. Su, D. Hao, B. J. Ni, Q. Zhang, C. Zhao, Heterostructured V-Doped Ni<sub>2</sub>P/Ni<sub>12</sub>P<sub>5</sub> Electrocatalysts for Hydrogen Evolution in Anion Exchange Membrane Water Electrolyzers[J]. *Small*, 2022, 18, 2204758. <https://doi.org/10.1002/smll.202204758>.
- [5] L. Yang, R. Liu, L. Jiao, Electronic Redistribution: Construction and Modulation of Interface Engineering on CoP for Enhancing Overall Water Splitting[J]. *Adv. Funct. Mater.*, 2020, 30, 1909618. <https://doi.org/10.1002/adfm.201909618>.
- [6] G. Zhou, M. Li, Y. Li, H. Dong, D. Sun, X. Liu, L. Xu, Z. Tian, Y. Tang, Regulating the Electronic Structure of CoP Nanosheets by O Incorporation for High-Efficiency Electrochemical Overall Water Splitting[J]. *Adv. Funct. Mater.*, 2020, 30, 1905252. <https://doi.org/10.1002/adfm.201905252>.
- [7] P. Wang, Y. Luo, G. Zhang, M. Wu, Z. Chen, S. Sun, Z. Shi, MnO<sub>x</sub>-Decorated Nickel-Iron Phosphides Nanosheets: Interface Modifications for Robust Overall Water Splitting at Ultra-High Current Densities[J]. *Small*, 2022, 18, 2105803. <https://doi.org/10.1002/smll.202105803>.
- [8] J. Balamurugan, T. T. Nguyen, V. Aravindan, N. H. Kim, J. H. Lee, Highly reversible water splitting cell building from hierarchical 3D nickel manganese oxyphosphide nanosheets[J]. *Nano Energy*, 2020, 69, 104432. <https://doi.org/10.1016/j.nanoen.2019.104432>.
- [9] J. Xiao, S. Zhang, Y. Sun, X. Liu, G. He, H. Liu, J. Khan, Y. Zhu, Y. Su, S. Wang, L. Han, Urchin-Like Structured MoO<sub>2</sub>/Mo<sub>3</sub>P/Mo<sub>2</sub>C Triple-Interface Heterojunction Encapsulated within Nitrogen-Doped Carbon for Enhanced Hydrogen Evolution Reaction[J]. *Small*, 2023, 19, 2206472. <https://doi.org/10.1002/smll.202206472>.
